# Supplementary material
Source: bioRxiv or medRxiv preprint supplement (https://www.biorxiv.org/highwire/filestream/89717/field_highwire_adjunct_files/3/289249-4.pdf)
Supplement: Supplementary file [file 289249-4.pdf]

**Suppl. File 4.** Ebolavirus vaccine candidates in clinical testing (5,33)

| <b>Vaccine candidate</b>                                                                                                                                                    | <b>Clinical phase</b> |
|-----------------------------------------------------------------------------------------------------------------------------------------------------------------------------|-----------------------|
| rVSV-ZEBOV (recombinant attenuated replication-competent vesicular stomatitis virus vector expressing Ebola virus GP)                                                       | Phase 3               |
| Recombinant replication-deficient adenovirus serotype 5 (rAd5) vector expressing Ebola virus and Sudan virus GP                                                             | Phase 2               |
| ChAd3-EBO-Z (recombinant replication-deficient chimpanzee adenovirus 3 vector expressing Ebola virus GP)                                                                    | Phase 1/2             |
| Ad26-EBOV (human recombinant adenovirus 26 vector expressing Ebola virus GP) / MVA-BN Filo (replication-deficient modified vaccinia Ankara expressing Ebola virus GP) boost | Phase 1               |
